# Supplementary material for: Acquisition of aluminium tolerance by modification of a single gene in barley
Source: PubMed Central journal article supplement — Nat Commun. 2012 Mar 6;3:713–. doi: 10.1038/ncomms1726 (PMC3316887; doi:10.1038/ncomms1726), 2012-03-06
Supplement: ncomms1726-s1.pdf [file ncomms1726-s1.pdf]

**Supplementary Figure S1. Genomic sequence of *HvAACT1*.**

**a**, Morex. **b**, Murasakimochi. The UTR region shows blue letters, *HvAACT1* ORF region shows red letters, 1kb insertion in Murasakimochi shows green letters. Alternative splicing sites between 5'-UTR-3,4,5 are indicated as blue triangles.

**a) Morex**

CCGGTAATGCCCGAAATCCTTCCGGTGACCAAATGAAACCATCCTATATATCAATCTTC  
ATTTCCATACCATTCCGGAAACCCTCGTGACGTCCGTGATCTCATCTGGGACTCCGAAC  
AACCTTCGGTCACCAACACATATAACTCAACTATACTAAAACGTCACCAAACCTTAAGT  
GTGCAAACCCTGCGGGTTCGAGAAGTATGCAGACATGACCCGAGACTCCTCGGTCAA  
TATCCAATAGCGGGACCTGGATGTCCATATTGGATCCTACATATTCTACGAAGATCTTA  
TCAGTTGAACCTCTGTGCCAAGGATTCATATAATCCCGTATAACATTCTCTTTGTCCTT  
CGGTATGTTACTTGCCCGAGATTTGATCGTCAGTATCTCTATACCTATTTCAATCTCGT  
TACCGGCAAGACTCTTTACTCGTTCCGTAATACAATATCCCGTGACTTACACTTGAGTC  
ACATTGCTTGCAAGGCTTATATGTGATGTTGTATTACCGAGTGGGCCCCGAGATACCTC  
TCCGTCACACGGAGTGATAGATCACAGTCTTGATCCATGCTAACTCAACGGACACCTTC  
GGAGATACCTGTAGAGCACCTTTATAGTCACCCAGTAACGTTGTGACGTTTGATACACA  
CAAGGTATTCTCCGGTGTCAGTGAGTTACATGATCTTATGGTCATAGGAATGAATACT  
TGACACGCAGAAAACAATAGCAACAAAATGACACGATCACATGCTACGCTTATAATTTG  
GGTCTTGTCTATCACATCATTCTCCTAATGATGTGATACAGTTATCAAGTGACAACACT  
TGCATATGGTCAGAAAACTTAACCATCCTTGATCAATTGGCTAGCTCAGCCCGTCCCT  
GGTCGAAACACATATAAAGAATCCAAAACAAATCCGCGGCGGTGCACCACGCTCACCG  
GTGCTCTGACCGACCCATTATAACCTAACTTTCCACGGGTTCCATCGTCCCTCTCCT  
TCCTCTTCCCTCGGTGCAGCTCCTTTCCACACACAGACGTCTTCTTCTTCTTCCCTCCAG  
GAAAAGGCGGAGGTCGATGGGATGCGTAACTAGGGGTGAAACGAAAGCGACGCAGGCC  
GCAGGCCTAACAGGTGGGTCACCCTCCCGAAAAGAAGCGGGCCAGGCTTTCCATTGCTG  
GCCTCTTATATTCAGAGAGAGTGAGTGACCTATATCCTCGACTTGTATACTGGTGTGGT  
GAACGCACACCGCACCCGCGCTCCCGCTGCAACCGGGCCTTTCTTGCCGGCGAGCC  
GCCAATGGCGCGCTGACACGGCGGACGGGGCGCCGGTGCAGCGGGCCGGCGTACGGCGG  
CGGCACGCGCGGGCCTGTGCTGGCCACGCGGCCCGCGGCTAAACAAGGGTTTTCTCCCG  
GCTATTGCGACTCCGACCTGGACTCCAGAGCTAGCCAAAAGGCAGCGGGAATCCACCG  
GACCCTCGAGCCGTCCCGCGACCGCAAGTACGCGAGCCGCGCCACGCGTGATTCGTGCC  
TCCCGCCGTCTCTCGCGGCGCTATTTATAGGGGCCACACGACCCAGTGTGGAGCAGC  
AGCCAGTAGCTCTCTGCGCTCAGCACCAAGAGCAAGTGCAGCCAAGACGCAACAGCTC  
TGCACCCAGTCGCCGGCCACTTCGCCACTTCAGGCCAGAGGTACGCCCTGCGTGTGCAT  
GCTTTGCTATGGCTTCTGCTTGATCATTCTTACAGGTAGCTAGATCATCTATCTTCTAT

5'-UTR-1

CGCATGTCGATATGGTGCTCTTCGGAGGTACGGGAGCTCGATCGATCGTAAGAACATAG  
CCAATGTCTTCGAGGCATGGCTCGGCCGAGCATAGCCATCGACGGTGACGTGTTGCACG  
GCAGGCCGTGATGCGTAGTTCTCAGTGTACCGACGTTTTAGCTAGGGTAGGTAATCGTT  
AAACGTAACCAACTATCCGAGCAAATGCAAGTGTTTTCTAACCACAAGCTGGCCCCGT  
CGTGGTGTCTCTGTCTAAGGTTGTACGCGCGGATTGTGATCGATCATTGGAGTACAAGA  
AACTAGGATATTGGTCCAACACTCTACCCTTCCTTCTTTTGCAAGGATATGCGGTGAAT  
TATTGCGCAGGAGTACGTGGTACATGGTTGTATCCTTCTAGGTACGTACGCACTCTGCA  
TGAGCCTGCTACGTACGTAGTTGACCAAACAACGCATATATCGATATATACACGCATAA  
ATCAGAATTA AAAACCATGCAAAGCAGCATTGACGGGGATATAGATGCTGTGCCAGAGA  
AGCTTAATCGATTGATAGCTATGTTATTCGCGGGTTTTATGTGCACCTTTAAATCTTCTT  
TTTCACGCGTCGGGTAGTGGTTTCCTAAAGTTGGCCGGCACCAGTCCAAAGCTGGGCTG  
GTTGCTGTTACAGAAGAAAGAAAGAGCGGTCAGGGTAACCACACGTCAGTAGATT CAGA  
TATGGTAGACGCCTTTTTGTTCCCTTCATTTCAACCAAGCACTCCAAAGCTGGCAGGCAC  
GACCTATCAGCATGGTATTAGTCTCCTAAAGCTGCTTAACTTGCCGATGACGCAGCTCG  
CATTCCACCCTGCTTTTTGTTGGATACACTTATAAACAGTTCGATTGGGATAGATATAAT  
GTGACCTCTTTTTGGTTGTTTTTTGCTTTTAGAGTGGCCAACATTCGGGATAAAAACCATC  
TGATCAAACATTTCTTATATGTTTGTCCACTAGTGATAATACTCAAATGTAGGATGCAG  
AAGATGATATATGCCGTGGACAGAATACAGTTAGTTTTGTGAGTTGTTTTTTTCGTTGTG  
TTGCTTGGTTTGTGCGGAAATTGTTTTGTTTCATTGTGAATCTGTAATAGCTGGGGCAAC  
TCGCACCTTTTTAGTTGTGCGATTTTCTACAGTCACAACCGACATGGTTTTAGTAAAAAC  
ATACATAATGCAACACAAATACACAATACA ACTACGATCAACTACGATAGTCCGGGGCG  
ATACTTTGTTTCGACCAAAGCTTTAAAGAATGAATATTATGAAAAATAAATATAGAAT  
ACATAACAAGAACTTGGCATCAATTTTAGTCAAGGCGGAGCATAGCATGAGGGGGGCCG  
GGGGGTCTATATGGATGGTAAGCCCTGACTTTATTTTGAAATCGCCAGGTGTGACACGT  
TTTGTGCGAGCATTAGTATCACATCCTATGATATGCATTCTCCCCAGAATTGTCATGGA  
GCTTCACATCAGTGGTCACATCTGCCTATCTATAGCTTTATCTTGCAGCACTGTCTTGG  
GCAAGATATTCTTGAGGAACTTATAACGAGACTGAGATGACAAGTATTCGAGTTTAAT  
TTGGTAAATTGGTACTCTGGAGTTTGAATCGTCAATCGCAACTCTCAGATGTGTCTGGG  
CATAAGGAATAGAAACACCACA ACTTTGATAGGACATTGTTATCCATGAAACAAAGTTT  
CGCTACCATGTTTTGTACATCTATGCTTATATGTGGTAGTACAAAGCAAAGGTGAGTG  
CTAAGAATAGGAATGGGGATGCAGAATATATCTTATATCGTGGAATCTATGACACTTAG  
ATGAACAACAAGCTGGCGCAGTAGTGAAGTACTCCTCACTTTTGTCAAAGGACCTGGG  
TTCGATATGATCTTTCTAAATTGCACTATGTAGGGGTAAGTTTTGCCTCGTATAATCCT  
TCCGCGGACGTTTTGCCTCGTATAATCCTTCCGCGGACCCTTTTGGTGTGGGAGCTTCT  
AGCATCAGGTCTGTTATTTTTTGTGTGGCAACTTTGTTGATTTGACTAAAGTGGTGAC  
GGTATTGCTTATCTATAGGGTAAGTTTTGCCTCGTATAATCCTTCCGAAGGTCAGTGA

GAGCTTCTAGCATCGGGTATGTCGTTCTTTAAAGACCGCTTGTTAATTTGACAGAAGTG  
GTACAATCTTTTGTCTATTTAAATTGGTTGTTTTGTTGCATCCTTTGACGTAACGCTTA  
GACCTTTTACACCTCCCTTGGCGGGGGGAACCCATGCCCCCCACCCCCGGTCTATGT  
TTTCAATGCCACTAAAAATTTCTAGCGTGATACGACAAACGATATGTGAAGACAATACT  
ACCGTACATGTCGTACACTAACTAGCTTTTACCACTAAGTCATTTGCCTTTTGAGTTT  
TTTCAACATAGAATTAGACGACTCCACTCCGACACACAAATATGGTCAAAGTAGCAAG  
ATTACCTTGCTAGCCAACCACATGTAGAAAGAGCAACCCACCAACTCATGTATGATTGG  
AATTATTTATGTAAGTGGTTAGTCCAACTGCTAGTGGCGCATCAGCAACATAATGACA  
TCACTAGAAGAGATAGTGGTGCCCAATACATATTTATGTTTGATGTTTTTGTGACTTAA  
GATCAGTTCGCTTCTCATAGAAGTTGGCGATGAGCTATGTATGATGTTTTATGGCTTAG  
CTGACACAGGTTTCGTTAAATGGTTGCAGCATATCGAATATGAATATGGAGTAGAAAGGT  
GGAAAGTAAATTTGATACTTAGTTGCCACTACACGATACATATTTTCTTTGTTCAAGTGT  
TTTCCCGAATTTCTAAAACTGTGGAAAAACCCATAAATGTGAGTTAGCTAACTGCTC  
AACACAAAAAGGAAGGGAAAGAATAGTGTGTGAGTTATCTAACCAAAAACTGTCATTT  
TTGTACAGGCGAGGTGAGTCAAACTTTTTGATTAATGGGTGCCAGTCCAGACGGTATAG  
CATGACTTACTACATAAACATATTATTTTAGCGGGTTATTTTTGAAAAATTAATGCAG  
CGGTAAC TACATGCATAAAATCCATTCTGAAAATTTGAGCAACGGAAGCACAGGCTTAT  
GGCATAATAAAAGTCACACTAGATTGCATAAAATATGTACTGTAGTTGAGGGGACACTG  
CATTATATTTACTCCTTTACCATTTGATGAGGAATAATCAAAGCGTGCATACCTTTTT  
GGTATATCAAATGTCATTTACTGAAAAAGGCTTTCGCCTTATTTTTATATAGAGCAAACC  
ACTAGACCAAGAGTACAAGCATAAGACCAAATCCAGACACACACACAGACACACACTAA  
GATAGCACGACACCAAGTACGGGGGTTCTGCTAAGGACACGGCTCAACAAGCCCTAAA  
AACAAAATAAGGCGGAGGGACCGCAATAGAAGCATCTGATCTAGCTCTGAAGGTGGCGG  
TGGAGGCGGCGGCACCAAGCGGAAGGCCATCGTCCGAAGATCTGCGATGATGGAGTTGA  
TGGCGTCCTGATCCTGGAGGCGGCTAAGCGGCCGTCAAAGATGCATATAACCACACATT  
TTAAACACCGCGTCCGGTCGCACGTCTAAGAGGAACTCGTTGAATTACAAGTTTATTTTC  
GACCGTCCATAGCGCCCAAGCGAAGACCGCAACGGCCAGCCATCAAATGTAATTTTAAT  
TCTACAAATTCTATGGAGTATAGTTCACTCCATTAATGCATATTCACCCCTCCTTTGC  
CCAATGCTACATGGAGGAACTACCTATAAAGACATGATGACAAATAGTCTAAGCGTTA  
TATCCATATCAGATGGGAGGGATAGAAAATCTCCTATCATCGTTCTCATTGGAAAGAGT  
GAAGAGATAAATAGCCATGAGTAGTGGGGAAACCAAGATGACTTCCTCATTTCATCTTC  
CCACCTAGAAGGAGAGGAAGATTCTAGTATAAAAAGGGCAAAAAGGAGACTAGGATGGG  
GTGGCTAAGGAGCACACA ACTGGAAAACA ACTACCCTAATTCTTCAAAGCAGAACAACC  
ATACATGTTATATGTCAAGAAA ACTGCTACTTCTAAATTA CTAGTGGGTAACCCATAAG  
CATATGCACTATCTTGTAACCAAACTATAGTAACCTTCATATTAGAATGTCCCAA ACT  
ACATAAGAAATGCTACACAATTGTAGTTT GAGTAGTATGATTTAGTAAGATGATCTTTC

ATTGCACGCACACAATTTGTGACATTA AAAATGGATGTACAGAATTAATTTGTGATAGTA  
GAAAAATACTATGTTGCATATCTATAGTAATAATATCACAACATTTTCTTTTTATGCTT  
TAAGGTA CTCTTTCAAGTGTGAAATAGAGAGTCGGTAGTTCTATCGTCGCCAAGGTCTC  
GAGCTAGTTGCTCCCTCAGATACTCAAACCGATGCCTATCCAAATACTTGAGGCCCT  
CTACGAGAATCGTCGCACTGAAGTTTTATCCTGATCTTTTGGCATCCTTCAAATGGTCA  
GGGCATTGAGCGAGACCCCAAATCCTTACCTTTTTGCCATGCCGCCTTGCCGCGCC  
CGTTGTTGATCCGAATCTCTATCCTGTCATACTTGGATCTCACCGGACGACGCGGCACA  
TAGGAAATTAACCATTAACATGCAACAATTGATCCATTGCATGCAACAATCGTGGTTC  
GACGGGTGAAGGAAAATCATGAATGATTTGCATGACTACTCTCGTGACAAAAATGTTCT  
TGCGTTTTCAAATGATGCAGTATTCCTCGCAAGTTGCACCTTGCTTCCCAGCAAAGCCTT  
GCATTTGCCGTACGAGAGATGAGAGGGGGAGGTGGTGGGGGGGAACGATAACAGAAAAT  
GGCCCGACCTCCTCACTCTTTCCGGCCGGGTGAGAAAAGCTGGTCGAGACGATGATCGA  
TCGCCCATGCCGCCTACGCCGGCCGGCGAGGCCGGACCGTACGTATCGCCGAGGGCCAT  
CCCAACGGTGGTACGTATGGCAGTTGCCGGGACGGCACTGACGGATCGCCGACGGCACC  
CGGCCGCTGGATCGAACGCCATGTCACTGGCTTGCGCGGTGATCACGCAACGTAACGG  
CACCAACCAATGCGCCGGAACCCCGGCCGGCCAGCCCGCCGCGCACGCATCCCGTCACA  
CGTTCCGGCTTGCGCCCGGCGCGTCCGTCCCCGGCTCGCTGGGTGCTCGACGTCGTCG  
ACGATCGGAGCGTTCCCCGGCGGCCCTTCCGCTCCATGATGCCATGCTCGTCGGCCCGTG  
GCACGTGCAGCTTGCCGTTGCGGCTCCGGCCGTAACGCCCGGCCATGTCGCGTTGCGCC  
CCCAGTCGTCACAGCGGCTGGGGGTGGTCGCTTTCCACGCTTAACAAAAAAGAAAAAA  
GAGAAGAAAAAAACTTCGATTCTTTCTGTTTTTGCTTTTGCTTCCGCACATAGCTG  
CTTGACGGCACGAGCTGGTTCCTTTTTCCGTGTCAGCTGATTTATCTCTTTTGTTTTC  
GAGGGAGAAAAGCCGATTTATTTTATTTCTGGAGCCACATCTGACAGACTGACTGACAC  
GCCCTCCCCCATTTCGCCATTCCATGTGACAGACAGCTTCTGATCGGTTCCGGTATAAG  
TAGGGGTGAGCTGCCGCTCTCTGGTGTCTCATCCCTCTCTCACGCACACTCCTCT  
GTCCGAGCACGAACGATCGGTTGATCGACCTCTCTCTCAGGCAAGCATCCGCTGTGTAT  
GGAGGAGGGCGCGGCCGCGAGCATGATGACCGGGACAAGAAGTGGGTGGCCGTCGTCG  
ACGTCCCCGACAGACGACGCTGCAACGGCGGCGAACGGACACGGCCCGGAGGAGAAG  
GCCGCGGAGGATCTGCCGGCGCATTGTCCGGCTGCCCCAGGACGACGGGGCTCTACCT  
CTTTGTCATGAACATCAGGTTTCGTTGATTTCTTTTACATACTGTACGTCTTACGAGTG  
CTCTCGTGTTGTCACGTCTGATGTGGTGAACGTGACCTTGTGCGCAGGAGCGTCTTCAA  
GCTCGACGAGCTCGGGTCCGAGGTGCTGCGCATTGCGGTGCCGGCGTCTTGGCCTGG  
CCGCCGATCCCCTGGCTTCTTGGTGGACACAGCATTATCGGCCGTCTAGGTAATCTC  
ACGACCATCCAACCAACATATCTACTATCTGTTTATGCAATGATGAAGAAGAAACATCT  
ATGCCAGTCGCTGTTGCAGCACCATATTCACCTGCACCTCCCCGTCTTGC GGAATTTCC  
GCGGGATAGATAAAGCTTCCCAATTAATTTTACC GGCGGTCTAATTTTAGGCAGTCG

5'-UTR-3-5

TACAAGGGGATTTCCAGATATGTGCCACCTTCGCTGTTTCTGTCAGTGGATAGTCCCCA  
CTTCAGTTTCCGGTTTGTGAGTTTGGCAAAGTAACTGACTTCGCTCTACAGTATCGGTC  
GCTTGATTTGGACATGTAACCGGCTCATTGCGGCCAAAAACCTTCCACAAAATGCGC  
GCGGGAGAATTTTTACCTTTGCTGACAATAGCGCCACCTTATTTTTCTGTTTTTGC  
AATAGGCCATGGCTGATAAATTGCTCATCTAGTGTATCTCCCGTCCTTCTTCTCCTG  
GTGAAACGGGCATGTCTCTAGTACATGTCTTCATATGATATCTTTCATTCTTTCCTTG  
ATTTGGTTATTACATTGGTGTTTTCATTAAATATTTGCACAATTGGTCCATGATCAGGT  
TCGGTGGAGATAGCAGCTGTTGGTGTCTATTGCCATATTTAACCAAGTCTCCAAAGT  
CTGTATCTACCCGCTTGTAGCGTAACAACATCATTGTCGCTGAAGAAGATGCCATCA  
TTAGCAAATACCTAGAAGAAAATAGCAGCCAAGACCTTGAGAAAGCCTCTCATGTGCAT  
TCAGATGCCTGCAATTTGCCCGCATCTGGTACCGAGCTCTTGCAATATACCTGGTTTCA  
AATTTCCAAATAGTAATTTGATTTACCCCGGACTGAAGCATTCTGCATGAATCTCTA  
TGTGGAACCTGTTTTACAGGTCTGATACGCCAGTGTGTGCTAATTCCTGCATACCCA  
CAGAGTGTACTGATCTCTCAAATCAAGGGTGAAGAAAAGGTACATACCTTCCGTGACA  
TCTGCTCTAATCGTTGGCTCATTCTCGGGCTAGTTCAGGCCGTGTTCTGATCTTTTC  
GGCGAAATTCGACTGGGCATCATGGGTGTGAAACATGTAGGTGTTATTACCTTTTGT  
TATGTCCAAGATTATTTACTTCTCTAGTTTCTTGCTATCCATGATGCTAATTCATATT  
TTCATCTACATCACACTATTCCAGGACTCACCGATGCTAGAACCCGCGGTTTCGATACCT  
AACGATCAGATCACTGGGCGCTCCTGCTGTTCTCCTGTCTTTGGCAATGCAGGGCGTTT  
TCCGGGGCTTCAAAGATACAAAGACACCGTTGTATGCTACTGGTAAGAATATCTGGTGA  
TGTCCATATAGGTTTCTGTTTTTAGGAAGAGGATAATTGAAGAGAAGCATCACTGACA  
TTTTCTTACAATTTCTTTTGCAGTGGTTGGGGATGCAACAAATATCATCCTAGATCCAA  
TTTTGATGTTTGTCTGCCACATGGGTGTCACTGGTGCAGCAGTTGCTCATGTCATTTCC  
CAGTAGGTTTTACCGCTACAATTAGCATCTGCAGCCTATGTGTTTCAGTGATCAGTCTG  
TCCTAACACGCTCCATTCCATCTTTTGCCTTCAGGTACCTGATAACTATGATCTTGAT  
ATGTGCGCTCGTCCAGCAAGTTGATGTTATCCACCGAGCCTTAAATCCCTGAAATTTG  
GGCGGTTTCTTGGTTGTGGTGAGATACTGTTGGAATCCTGAAACTGGATAACATCTCTC  
ACTGGTCCCCTGGAAATGGCTCTGAAAATGCTCTGTTTTCTTCAGGATTCTGCTGCTC  
GCAAGGGTGGTAGCGGTGACGTTCTGTGTCCTCTGGCGTCGTCGCTGGCTGCCCGCGA  
CGGACCTACCATCATGGCGGCCTTCCAGATCTGCTGCCAGCTCTGGCTCGCGACGTAC  
TTCTCGCCGATGGATTGGCCGTTGCTGGACAGGTCAGACCGCCAAATCATATTCCATA  
TATTTATTGGTCCATGAGGAACAGCTTCAGTTGAGACTAGAGAGTGTGCTGAACTGGGG  
TGTGTTGCGGATGAGTTCTTGCAGGCAGTGCTCGCAAGCGGTTCCCAAGAACGATCA  
CAAGAAGGTGATTGCCCGACCTCTCGTGTCTGCAGGTTTGTGACCGTTGATTCTTGC  
CACTTCTCCATATATTTTTCCAGAGTTTCAATTCATTGAGAAGAGTTAATGGTGACCT  
CTTCTCTTTCAGCTGAGCATCGTTCTGGGGATGGCCTGACGGTGGTGTCTGCTC

TTCATGAAGTTCGGCGCTGGCGTTTTTCACGAGGGACGCAGACGTGATCAACGTCATCCA  
CAAAGGCATCCCGTAAGAAACCTTGGCTGTACAAAACATGAGAATGCCATACGAGATT  
CAGACACTGAAAATAGCTCTGTTTGGGGTGTTCAGTTTGTGCGCCGGCACGCAGACGA  
TAAACGCCCTCGCGTTCGTGTTTCGACGGCATCAACTTCGGAGCACAAGACTACACCTAC  
TCTGCATACTCCATGGTACCGTAGACCCTTTCACAGCAGCATCAATATTTTAGCTCTGA  
AACTTGTCCCGAGACTGAAATTGGATCCCATGGAAACCTTCAGGTTGGGGTGGCGTCCA  
TATCGATACCGTGCCTGGTGTACCTCTCGGCGCACAAGGGATTCATCGGCATATGGGTC  
GCATTGACCATCTACATGAGCCTCAGGACCGTAGCTAGCACCTGGAGGTATGAACGATA  
CTATGCTCCTCCACCCTACCCCCACCCCCCTCCTCATCACTTCATCAGTACCTCCATTT  
CTTCGGTAGCCCCGACCCTTTTGTAGCGCCGCTGACAGGAGGAATGTTTTCAAATCCT  
GCTGAAATTGAACTGTTCTATGTGAAACCCTTGCAAATATGTGTTCTATAATCTTCAA  
TTGGGGCTCATCAAGGTTTTGTGACTCTGGTGTCTGCAGGATGGGGGTGCGAGAGGGC  
CATGGGTTTTCTCCGGAAGTGATGGATCAGCTCGCGAGGATGATGGCGTTTCGTCTAC  
AGTGCTATTAGCTGGTAGATAGCCATATGCATATGCTCGTTCATGTAATTACAATAAG  
AATAGTGGAGTATTATTTTGTGCTGTTTTAAGCTTCGGGTATTGGAGTTAGAAGGGGC  
CTATTGCTTCACGGTCGTCTGCCTTTTGTGCGAGGAG

3'-UTR

## b) Murasakimochi

TAGATGAGTTCTCCGGCAGCGTGACGGCACGCCGGTGATGGTGATGATCTATTCCTGCA  
GGGCTCCGCCCGAGCTCCGCAGAAATCTGATCTAGAGGTAGAACTACGAGGTATAGGTT  
TGAGTTGCACGTGGCAAAGGTATGTCTCAAAAACCCTAAAACCACCAGTATATATAGGA  
GGAGGGGAGGGGCTAGCCGGCGCCGGCCGAAGGGAGGAGGAGGACTCCTACTCCAATTC  
GGTTTAGGAAGGAGGAGTCGTCCTCTTCCCTTCCCACCTCTCTCTTTTTTTTTCTTTT  
TTTTGGTTTTTCTCCTTGTGGCGCCATAGCCCACTTGGGCTGGCCTCACCAACCCACTA  
AGGGTTGCTGTGCCACCCAAGGGCTATTCGTCACTCCCGGTAATGCCCGAAATCCTTCC  
GGTGACCAAATGAAACCATCCTATATATCAATCTTCAATTTCCATACCATTCCGGAACC  
CTCGTGACGTCCGTGATCTCATCTGGGACTCCGAACAACCTTCGGTCACCAACACATAT  
AACTCAACTATACTAAAACGTCACCAAACCTTAAGTGTGCAAACCCTGCGGGTTCGAGA  
ACTATGCAGACATGACCCGAGACACTCCTCGGTCAATATCCAATAGCGGGACCTGGATG  
TCCATATTGGATCCTACATATTCTACGAAGATCTTATCAGTTGAACCTCTGTGCCAAGG  
ATTCATATAATCCCGTATAACATTCTTTTGTCTTCCGGTATGTTACTTGCCCGAGATT  
TGATCGTCAGTATCTCTATACCTATTTCAATCTCGTTACCGGCAAGACTCTTTACTCGT  
TCCGTAATACAATATCCCGTGACTTACACTTGAGTCACATTGCTTGCAAGGCTTATATG  
TGATGTTGTATTACCGAGTGGGCCCCGAGATACCTCTCCGTACACGGAGTGATAGATC

ACAGTCTTGATCCATGCTAACTCAACGGACACCTTCGGAGATACCTGTAGAGCACCTTT  
ATAGTCACCCAGTAACGTTGTGACGTTTGATACACACAAGGTATTCCTCCGGTGTCACT  
GAGTTACATGATCTTATGGTCATAGGAATGAATACTTGACACGCAGAAAACAATAGCAA  
CAAATGACACGATCACATGCTACGCTTATAATTTGGGTCTTGTCTATCACATCATTCT  
CCTAATGATGTGATACAGTTATCAAGTGACAACACTTGCATATGGTCAGAAAACTTAA  
CCATCCTTGATCAATTGGCTAGCTCAGCCCGTCCCTGGTCGAAACACATATAAAGAATC  
CAAACAATCCGCGGCGCGTGCACCACGCTCACCGGTGCTCTGACCGACCCATTATA  
ACCTAACTTTCCACGGGTTCCATCGTCCCTCTCCTTCTCCTCGGTGCAGCTCCT  
TTCCACACACAGACGTCTTCTTCTTCTCCTCCAGGAAAAGGCGGAGGTGCATGGGAT  
GCGTAAACTAGGGGTGAAACGAAAGCGACGCAGGCCGACGGCCTAACAGGTGGGTCAAC  
CTCCCGAAAAGAAGCGGGCCAGGCTTTCCATTGCTGGCCTCTTATATTCAGAGAGAGTG  
AGTGACCTATATCCTCGACTTGTATACTGGTGTGGTGAACGCACACCGCACCCGCGC  
TCCCGCTGCAACCGGGCCTTTCTGGCCGGCGAGCCGCAATGGCGCGCTGACACGGCG  
GACGGGGGCGCCGGTGCAGCGGGCCGGCGTACGGCGGGCAGCGCGGGCCCTGTGCTGG  
CCACGCGGCCCGCGGCTAAACAAGGGTTTTCTCCCGGCTATTGCGACTCCGACCTGGAC  
TCCAGAGCTAGCCAAAAGGCAGCGGAATCCACCGGACCCTCGAGCCGTCCTCCGCGGCC  
GCAAGTACGCGAGCCGCGCCACGCGTGATTCGTGCCTCCCGCCGTCCTCTCGCGGGCC  
TATTTATAGGGGCCACACGACCCAGTGTGGAGCAGCAGCCAGTAGCTCTCTGCGCTCAG  
CACCCAAGAGCAAGTGCAGCCAAGACGCAACAGCTCTGCACCCAGTCGCCGGCCACTTC  
GCCACTTCAGGCCAGAGGTACGCCCTGCGTGTGCATGCTTTGCTATGGCTTCTGCTTGA  
TCATTCTTACAGGTAGCTAGATCATCTATCTTCTATCGCATGTCGATATGGTGCTCTTC  
GGAGGTACGGGAGCTCGATCGATCGTAAGAACATAGCCAATGTCTTCGAGGCATGGCTC  
GGCCGAGCATAGCCATCGACGGTGACGTGTTGCACGGCAGGCCGTGATGCGTAGTTCTC  
AGTGTACCGACGTTTTAGCTAGGGTAGGTAATCGTTAAACGTAACCAACTATCCGAGCA  
AATGCAAGTGTTTTCTAACCACAAGCTGGCCCCGTCGTGGTGTCTCTGTCTAAGGTTG  
TACGCGCGGATTGTGATCGATCATTGGAGTACAAGAACTAGGATATTGGTCCAACACT  
CTACCCTTCTTCTTTTGAAGGATATGCGGTGAATTATTGCGCAGGAGTACGTGGTAC  
ATGGTTGTATCCTTCTAGGTACGTACGCACTCTGCATGAGCCTGCTACGTACGTAGTTG  
ACCAAACAACGCATATATCGATATATACACGCATAAATCAGAATTA AAAACCATGCAAA  
GCAGCATTGACGGGGATATAGATGCTGTGCCAGAGAAGCTTAATCGATTGATAGCTATG  
TTATTCGCGGGTTTATGTGCACCTTTAAATCTTCTTTTTTACGCGTCGGGTAGTGGTTT  
CCTAAAGTTGGCCGGCACCAGTCCAAAGCTGGGCTGGTTGCTGTTACAGAAGAAAGAAA  
GAGCGGTCAGGGTAACCACACGTCAGTAGATTAGATATGGTAGACGCCTTTTTTGTTC  
TTCATTTCAACCAAGCACTCCAAAGCTGGCAGGCACGACCTATCAGCATGGTATTAGTC  
TCCTAAAGCTGCTTAACTTGCCGATGACGCAGCTCGCATTCCACCCTGCTTTTTGTTGGA  
TACACTTATAAACAGTTCGATTGGGATAGATATAATGTGACCTCTTTTGGTTGTTTTT

5'-UTR-1

GCTTTTAGAGTGGCCAACATTCGGGATAAAACCATCTGATCAAACATTTCTTATATGTT  
TGTCCTACTAGTGATAATACTCAAATGTAGGATGCAGAAGATGATATATGCCGTGGACAG  
AATACAGTTATGCCCTGTTTGGTTGCATAGAATTGGGCATGAAATTAAGAATCTAGAA  
TTGGGCCCTAATTCTTTTGGTTGTATTAGGAATTTGCATCTGGAAACCCAGGCC  
CAATTCCGAGCGGACCAGCCCCGTGTGCGAAACATTTCCGAGCTGTGGAGGTGGGAAAT  
CTCACGGAATCTGCTCGTCTCGCGTTTTCTCCCTGACTTGCTGCATCGAGAGACAAC  
CTACTCCAGCGACCACGCACGAGGCGGGAGTCGCCGGCGGCCGAGCAGGTCAGCCTCC  
ATCTCCAGCCCTTCTCCTCTTCCCCGCCACCTTCTCCTCGCCGCCTCCCTCTCCCAT  
CTCGCCCTACCCCTGGACGGCCCTCCCCGCATAGGCCGAACCCAGATCGGGGATTGA  
CGGTGGGATGGTGATCGACGGCGGCCATGGATGCTGCGTGACCCGCCGCCGCACCTAC  
CCCTGGCCGGCCCTCCCCGCATAGGCCGAACCCAGATCGGGGATTGACTACGGGATG  
GTGACCGACGGCGGCCATGGATGCTGCGCCGACCCGCCGCCGCACCTACCCCTGGACGG  
CCCCTCCCCGCATAGGCCGAACCCAGATCGGGGATTGACTACGGGATGGTGACCGACG  
GCGGCCATGGATGCTGCGCCGACCCGCCGCCGCACCTACCCCTGGCCGGCCCTCCCCG  
CATAGGCCGAACCCAGATCGGGGATTTACTACGGGATGGTGACCGACGGCGGCCATGG  
ATGCTGCGCCGACCCGCTGCCGCACCTACCCCTGGCCGGCCCTCCCTGCATATCATCG  
ATGTTATATTGTTCAAATTCAAAAAATTACAATTCCACATGATGTACATCCAAAGAGG  
ATTTGGAATTCCATTCCAGCCTTGATTCTACGGACGAATACCATGCGCATCCAAACAGC  
AAACTGGAATTCCATTCAAATCGTTGATTTGGTATTCCATTGCCAATTCAATTCCGCG  
GCGAATTCTGCGCAACCAAACAGGGCATTAGTTTTGTGAGTTGTTTTTTCGTTGTGTTG  
CTTGGTTTGTGCGGAAATTGTTTTGTTTATTGTGAATCTGTAATAGCTGGGGCAACTCG  
CACTTTTTTAGTTGTGCGATTTTCTACAGTCACAACCGACATGGTTTTAGTAAAAACATA  
CATAATGCAACACAAATACACAATACTACGATCAACTACGATAGTCCGGGGCGATA  
CTTTGTTTCGACCAAAGCTTTAAAGAATGAATATTATGAAAAAATAAATATAGAATACA  
TAACAAGAACTTGGCATCAATTTTAGTCAAGGCGGAGCATAGCATGAGGGGGGCGGGG  
GGTCTATATGGATGGTAAGCCCTGACTTTATTTTGAATCGCCAGGTGTGACACGTTTTT  
GTCGAGCATTAGTATCACATCCTATGATATGCATTCTCCCCAGAATTGTCATGGAGCT  
TCACATCAGTGGTCACATCTGCCTATCTATAGCTTTATCTTGCAGCACTGTCTTGGGCA  
AGATATTCTTGAGGAACTTATAACGAGACTGAGATGACAAGTATTCGAGTTTAATTTG  
GTAAATTGGTACTCTGGAGTTTGAATCGTCAATCGCAACTCTCAGATGTGTCTGGGCAT  
AAGGAATAGAAACACCACAACCTTTGATAGGACATTGTTATCCATGAAACAAAGTTTCAC  
TACCATGTTTTGTACATCTATGCTTATATGTGGTAGTACAAAGCAAAGGTGAGTGCTA  
AGAATAGGAATGGGGATGCAGAATATATCTTATATCGTGGAATCTATGACACTTAGATG  
AACACAAGCTGGCGCAGTAGTGAAGTACTCCTCACTTTTGTCAAAGGATCTGGGTTC  
GATATGATCTTTCTAAATTGCACTATGTAGGGGTAAGTTTTGCCTCGTATAATCCTTCC  
GCGGACGTTTTGCCTCGTATAATCCTTCCGCGGACCCTTTTGGTGTGGGAGCTTCTAGC

5'-UTR-2



ATCAGGTCTGTTATTTTTTGTGTGGCAACTTTGTTGATTTGACTAAAGTGGTGCACGGT  
ATTGCTTATCTATAGGGGTAAGTTTTGCCTCGTATAATCCTTCCGAAGGTCAGTGAGAG  
CTTCTAGCATCGGGTATGTCGTTCTTTAAAGACCGCTTGTTAATTTGACAGAAGTGGTA  
CAATCTTTTGTCTATTTAAATTGGTTGTTTTGTTGCATCCTTTGACGTAACGCTTAGAC  
CTTTTACACCTCCCTTGGCGGGGGGAACCCATGCCCCCCCACCCCCGGTCTATGTTTT  
CAATGCCACTAAAAATTTCTAGCGTGATACGACAAACGATATGTGAAGACAATACTACC  
GTACATGTCGTACACTAACTAGCTTTTACCACTAAGTCATTTGCCTTTTGAGTTTTTT  
CAACATAGAATTAGACGACTCCACTCCGACACACAAATATGGTCAAAGTAGCAAGATT  
ACCTTGCTAGCCAACCACATGTAGAAAGAGCAACCCACCAACTCATGTATGATTGGAAT  
TATTTATGTAAGTGGTTAGTCCAACTGCTAGTGGCGCATCAGCAACATAATGACATCA  
CTAGAAGAGATAGTGGTGCCCAATACATATTTATGTTTGATGTTTTTGTGACTTAAGAT  
CAGTTCGCTTCTCATAGAAGTTGGCGATGAGCTATGTATGATGTTTTATGGCTTAGCTG  
ACACAGGTTTCGTTAAATGGTTGCAGCATATCGAATATGAATATGGAGTAGAAAGGTGGA  
AAGTAAATTTGATACTTAGTTGCCACTACACGATACATATTTTCTTTGTTTCAGTGTTTT  
CCCGAATTTCTAAAACTGTGGAAAAACCCATAAATGTGAGTTAGCTAACTGCTCAAC  
ACAAAAAGGAAGGGAAAGAATAGTGTGTGAGTTATCTAACCAAAAACTGTCATTTTTG  
TACAGGCGAGGTGAGTCAAACTTTTTGATTAATGGGTGCCAGTCCAGACGGTATAGCAT  
GACTTACTACATAAACATATTATTTTAGCGGGTTATTTTTGAAAAATTAATGCAGCGG  
TAACTACATGCATAAAATCCATTCTGAAAATTTGAGCAACGGAAGCACAGGCTTATGGC  
ATAATAAAAGTCACACTAGATTGCATAAAATATGTACTGTAGTTGAGGGGACACTGCAT  
TATATTTACTCCTTTACCATTTGATGAGGAATAATCAAAGCGTGCATACCTTTTTGGT  
ATATCAAATGTCATTTACTGAAAAAGGCTTTTCGCCTTATTTTATATAGAGCAAACCACT  
AGACCAAGAGTACAAGCATAAGACCAAATCCAGACACACACACAGACACACACTAAGAT  
AGCACGACACCAAATACGGGGGGTTCTGCTAAGGACACGGCTCAACAAGCCCTAAAAAC  
AAAATAAGGCGGAGGGACCGCAATAGAAGCATCTGATCTAGCTCTGAAGGTGGCGGTGG  
AGGCGGCGGCACCAAGCGGAAGGCCATCGTCCGAAGATCTGCGATGATGGAGTTGATGG  
CGTCCTGATCCTGGAGGCGGCTAAGCGGCCGTCAAAGATGCATATAACCACACATTTTA  
AACACCGCGTCGGCCGCACGTCTAAGAGGAACCTCGTTGAATTACAAGCTTATTTTTCGAC  
CGTCCATAGCGCCCAAGCGAAGACCGCAACAGCCAGCCATCAAATGTAATTTTAATTCT  
ACAAATTCTATGGAGTATAGTTCACTCCATTAATGCATATTCACCCCTCCTTTGCCCA  
ATGCTACATGGAGGAACTGCCTATAAAGACATGATGACAAATAGTCTAAGCGTTATAT  
CCATATCAGATGGGAGGGATAGAAAATCTCCTATCATCGTTCTCATTGGAAGAGTGAA  
GAGATAAATAGCCATGAGTAGTGGGGAAACCAAGATGACTTCCTCATTTCATCTTCCCA  
CCTAGAAGGAGAGGAAGATTCTAGTATAAAAAGGGCAAAAAGGAGACTAGGATGGGGTG  
GCTAAGGAGCACACAACCTGGAAAACAACCTACCCTAATTCTTCAAAGCAGAACAACCATA  
CATGTTATATGTCAAGAAAACCTGCTACTTCTAAATTACTAGTGGGTAACCCATAAGCAT

ATGCACTATCTTGTAACCAAACTATAGTAACCTTCATATTAGAATGTCCCAAACACTACA  
TAAGAAATGCTACACAATTGTAGTTTGAGTAGTATGATTTAGTAAGATGATCTTTCATT  
GCACGCACACAATTTGTGACATTAATAATGGATGTACAGAATTAATTTGTGATAGTAGAA  
AAATACTATGTTGCATATCTATAGTAATAATATCACAAACATTTTCTTTTTATGCTTTAA  
GGTACTCTTTCAAGTGTGAAATAGAGAGTCGGTAGTTCTATCGTCGCCAAGGTCTCGAG  
CTAGTTGCTCCCTCAGATACTCAAACCGATGCCTATCCAATACTTGAGGCCCTCTA  
CGAGAATCGTCGCACTGAAGTTTTATCCTGATCTTTTGGCATCCTCCAAATGGTCAGGG  
CATTGAGCGAGACCCCAAAATCCTTACCTTTTTGCCATGCCGCCTTGCCGCGCCCGT  
TGTTGATCCGAATCTCTATCCTGTCATACTTGGATCTCACCGGATGACGCGGCACATAG  
GAAATTAACCATTAACATGCAACAATTGGTCCCATTGCATGCAACAATCGTGGTTCGAC  
GGGTGAAGGAAAATCATGAATGATTTGCATGACTACTCTCGTGACAAAAATGTTCTTGC  
GTTTCAAATGATGCAGTATTCCTCGCAAGTTGCACCTTGCTTCCCAGCGAAGCCTTGCA  
TTTGCCGTACAAGAGATGAGAGGGGGAGGTGGTGGGGGGGAACGATAACAGAAAATGGC  
CCGACCTCCTCACTCTTCCGGCCGGGTCAGAAAAGCTGGTCGAGACGATGATCGATCG  
CCCATGCCGCCTACGCCGGCCGGCGAGGCCGGACCGTACGTATCGCCGAGGGCCATCCC  
AACGGTGGTACGTATGGCAGTTGCCGGGACGGCACTGACGGATCGCCGACGGCACCCGG  
CCGCTGGATCGAACGCCATGTCACTGGCTTGC GCGGTTCGATCACGCAACGTAACGGCAC  
CAACCAATGCGCCGGAACCCCGGCCGGCCAGCCCGCCGCGCACGCATCCCGTCACACGT  
TCCGGCTTGC GCGCCGGCGGTCGGTCCCCCGGCTCGCTGGGTGCTCGACGTCGTCGACG  
ATCGGAGCGTTCCCCGGCGGCCTTCCGCTCCATGATGCCATGCTCGTCGGCCCGTGGCA  
CGTGCAGCTTGCCGTTTCGCGCTCCGGCCGTAACGCCCGGCCATGTCGCGTTGC GCGCCC  
AGTCGTCACAGCGGTGGGGGTGGTTCGCTTCCCCACGCTTAACAAAAAAGAAAAAAGAG  
AAGAAAAAAACTTCGATTCCTTTCTGTTTTTGCCTTTTGCTTCCGCACATAGCTGCTT  
GCACGGCACGAGCTGGTTCCTTTTCCGTGTCAGCTGATTTATCTCTTTTGTTTTCGAG  
GGAGAAAAGCCGATTTATTTTATTTCTGGAGCCACATCTGACAGACTGACTGACACGCC  
CTGCCCCCATTGCCATTCCATGTGACAGACAGCTTCTGATCGGTTCCGGTATAAGTAG  
GGGTGAGCTGCGCGTCTCCTGGTGCTCTCATCCCTCCTCTCACGCACACTCCTCTGTC  
CGAGCACGAACGATCGGTTGATCGACCTCTCTCTCAGGCAAGCATCCGCTGTGTATGGA  
GGAGGGCGCGGCCGCGAGCATGATGACCGGGACAAGAAGTGGGTGGCCGTCGTCGACG  
TCCCCGAGACGACGCTGCAACGGCGGCAACGGACACGGCCCGGAGGAGAAGGCC  
GCGGAGGATCTGCCGGCGGCATTGTCCGGCTGCCCCAGGACGACGGGGCTTACCTCTT  
TGTCATGAACATCAGGTTTCGTTGATTTCTTTTACATACTGTACGTCTTACGAGTGCTC  
TCGTGTTTCGTCACGTCTGATGTGGTGAACGTACCTTGTGCGAGGAGCGTCTTCAAGCT  
CGACGAGCTCGGGTCGGAGGTGCTGCGCATTGCGGTGCCGGCGTCGTTGCCCTGGCCG  
CCGATCCCCTGGCTTCTTGGTGGACACAGCATTTCATCGGCCGTCTAGGTAATCTCACG  
ACCATCCAACCAACATATCTACTATCTGTTTATGCAATGATGAAGAAGAAACATCTATG

5'-UTR-3-5

CCAGTCGCTGTTGCAGCACCATATTCACCTGCACCTCCCCGTCTTGCGGAATTTCCGCG  
GGATAGATAAAGCTTCCCAATTAATTTTCACCGCGGTCTAATTTTAGGCAGTCGTAC  
AAGGGGATTTCCAGATATGTGCCACCTTCGCTGTTTCTGTCAGTGGATAGTCCCCACTT  
CAGTTTCCGGTTTGTGAGTTTGGCAAAGTAACTGACTTCGCTCTACAGTATCGGTGCT  
TGATTTGGACATGTAACCGGCTCATTGGCGCCAAAAACCTTCCACAAAATGCGCGCG  
GGAGAATTTTTCACCTTTGCTGACAATAGCGCCACCTTATTTTCTGTTTTTGCCAA  
AGGCCATGGCTGATAAATTGCTCATCTAGTGTATCTCCCCGTCTTCTTCTCCTGGTG  
AAACGGGCATGTCTTAGTACATGTCTTCATATGATATCTTTCATTCTTTCCTTTGATT  
TGTTATTACATTGGTGTTCATTAATATTTGCACAATTGGTCCATGATCAGGTTTCG  
GTGGAGATAGCAGCTGTTGGTGTTCATTGCCATATTTAACCAAGTCTCCAAAGTCTG  
TATCTACCCGCTTGTTAGCGTAACAACATCATTGTCGCTGAAGAAGATGCCATCATT  
GCAATACTAGAAAGAAATAGCAGCCAAGACCTTGAGAAAGCCTCTCATGTGCATTCA  
GATGCCTGCAATGTGCCCGCATCTGGTACCGAGCTCTTGCAATATACCTGGTTTCAA  
TTCCAAATAGTAATTTGATTTACCCCCAGGACTGAAGCATTCTGCATGAATCTCTATG  
GAACTCTGTTTTACAGGTCCTGATACGCCAGTGTGTGCTAATTCCTGCATACCCACAG  
AGTGTACTGATCTCTCAAATCAAGGGTGCAAGAAAAGGTACATACCTTCCGTGACATCT  
GCTCTAATCGTTGGCTCATTCTCGGGCTAGTTCAGGCCGTGTTCTGATCTTTTCGGC  
GAAATTCGTAAGGATCAAGGATGTTGAAACATGTAGGTGTTATTACCTTTTGTATAT  
GTCCAAGATTATTTACTTCTCTAGTTTCTTGCTATCCATGATGCTAATTCATATTTTC  
ATCTACATCACACTATTCCAGGACTCACCGATGCTAGAACCCGCGGTTGATACCTAAC  
GATCAGATCACTGGGCGCTCATGCTGTTCTCCTGTCTTTGGCAATGCAGGGCGTTTTCC  
GGGCTTCAAAGATACAAAGACACTGTTGTATGCTACTGGTAAGAATATCTGGTGATGT  
CCTATATAGGTTTCTGTTTTTAGGAAGAGGATAATTGAAGAGAAGCATCACTGACATTT  
CCTTACAATTTCTTTTGCAGTGGTTGGGGATGCAACAAATATCATCCTAGATCCAATTT  
TGATGTTTGTCTGCCACATGGGTGTCACTGGTGCAGCAGTTGCTCATGTCAATTTCCAG  
TAGGTTTTACCGCTACAATTAGCATCTGCAGCCTATGTGTTTCAGTATCAGTCTGTCC  
TAACAACGCTCCATTCCATCTTTTGCCTCCAGGTACCTGATAACTATGATCTTGATATG  
TCGGCTCGTCCAGCAAGTTGATGTTATCCCACCGAGCCTTAAATCCCTGAAATTTGGG  
GTTTTCTTGGTTGTGGTGTGAGATACTGTTGGAATCCTGAAACTGGATAACATCTCTCACT  
GGTCCCCTGGAAATGGCTCTGAAAATGCTCTGTTTTCTTTCAGGATTCCTGCTGCTCGCA  
AGGGTGGTAGCGGTGACGTTCTGTGTCACCTCTGGCATCGTCGCTGGCTGCCCGCGACGG  
ACCTACCATCATGGCGGCCTTCCAGATCTGCTGCCAGCTCTGGCTCGCGACGTCACTTC  
TCGCCGATGGATTGGCCGTTGCTGGACAGGTCAGACCGCCAAATCATATTCCCATATAT  
TTATTGGTCCATGAGGAACAGCTTTCAGTTGAGACTAGAGAGTGTGCTGAACTGGGGTGT  
GTTGCGGATGAGTTCTTGCAGGCAGTGTCTCGCAAGCGGTTCCCAAGAACGATCACAA  
GAAGGTGATTGCCCGACCTCTCGTGTTCGAGGTTTTGTGACCGTTGATTCTTGCCAC

TTCTCCATATATTTTTCCAGAGTTTCAATTCATTGAGAAGAGTTAATGGTGACCTCTT  
TCTCTTTGCAGCTGAGCATCGTTCTGGGGATGGGCCTGACGGTGGTGGTCTTCTTC  
ATGAAGTTCGGCGCTGGCGTTTTACGAGGGACGCAGACGTGATCAACGTCATCCACAA  
AGGCATCCCGTAAGAAACCTTGGCTGTACAAAACATGAGAATGCCATACGAGATTCAG  
ACACTGAAAATAGCTCTGTTTGGGGTGTTCAGTTTGTCGCCGGCACGCAGACGATAA  
ACGCCCTCGCGTTCGTGTTTCGACGGCATCAACTTCGGAGCACAAGACTACACCTACTCT  
GCATACTCCATGGTACCGTAGACCCTTTCACAGCAGCATCAATATTTTAGCTCTGAAAC  
TTGTCCCGAGACTGAAATTGGATCCCATGGAAACCTTCAGTTGGGGTGGCGTCCATAT  
CGATACCGTGCCTGGTGTACCTCTCGGCGCACAAGGGATTCATCGGCATATGGGTGCA  
TTGACCATCTACATGAGCCTCAGGACCGTAGCTAGCACCTGGAGGTATGAACGATACTA  
TGCTCCTCCACCCCTACCCCAACCCCTCCTCATCACTTCATCAGTACCTCCATTTCT  
TCGGTAGCCCCGACCCCTTTTGTAGCGCCGCTGACAGGAGGAATGTTTTCAAATCCTGC  
TGAAATTGAACTGTTCTATGTGAAACCCTTGCAAAATATGTGTTCTATAATCTTCAATT  
GGGGCTCATCAAGGTTTTGTGACTCTGGTGTCTGCAGGATGGGGGCTGCGAGAGGGCCA  
TGGGTTTTCTCCGGAAGTGATGGATCAGCTCGCGAGGATGATGGCGGTTTCGTCTACAG  
TGCTATTAGCTGGTAGATAGCCATATGCATATGCTCGTTCCATGTAATTACAATAAGAA  
TAGTGGAGTATTATTTTGTGCTGTTTTAAGCTTCGGGTATTGGAGTTAGAAGGGGCCT  
ATTGCTTCACGGTCGTCTGCCTTTTGTGCGAGGAG

3'-UTR

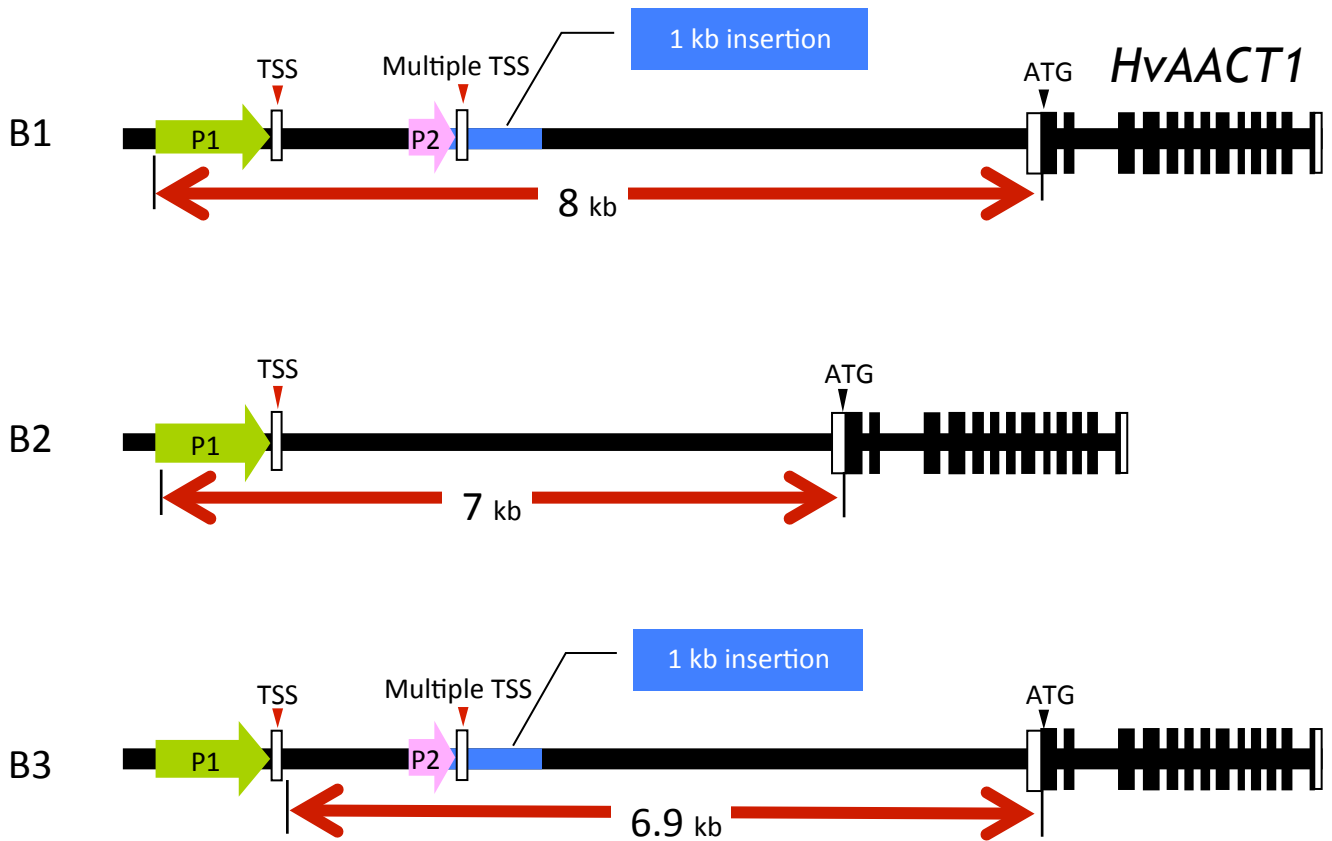

**Supplementary Figure S2.** Schematic presentation of constructs used for transformation. Promoters of Murasakimochi-type (B1), Morex-type (B2) and insertion-originated promoter (B3) were fused with cDNA of *HvAACT1* from Morex. Red arrows indicate the sequence used for each construction. Black vertical boxes and black lines show exons and introns, respectively, and white box shows the 5'-UTR. P1 means common promoter, P2 means insertion region promoter.

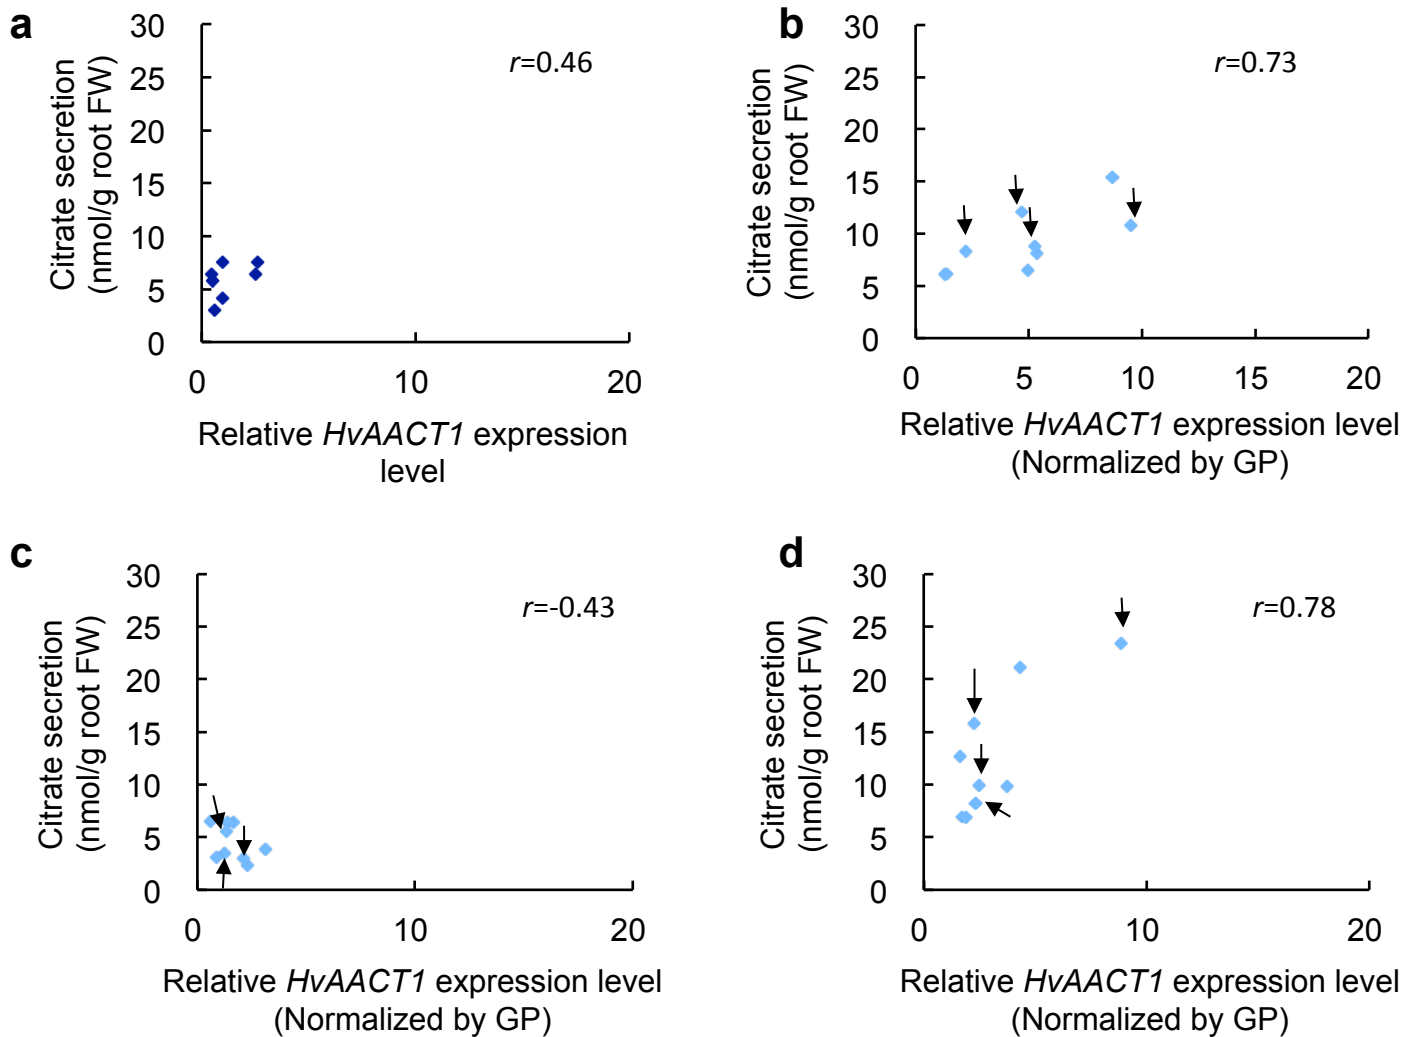

**Supplementary Figure S3.** Correlation between expression level of *HvAACT1* in the roots and Al-induced secretion of citrate in T0 transgenic barley (GP, B1-B3). The root exudates were collected for 6 h in the presence of 10  $\mu$ M Al.  $r$  means correlation coefficient. (a) non-transgenic barley (Golden Promise), (b) *HvAACT1* ORF fused with Murasakimochi promoter (B1), (c) Morex promoter (B2) and (d) insertion-originated promoter (B3) were transformed to the barley cultivar Golden Promise (GP) by *Agrobacterium* mediated transformation. The arrow showed that lines used for further analysis.

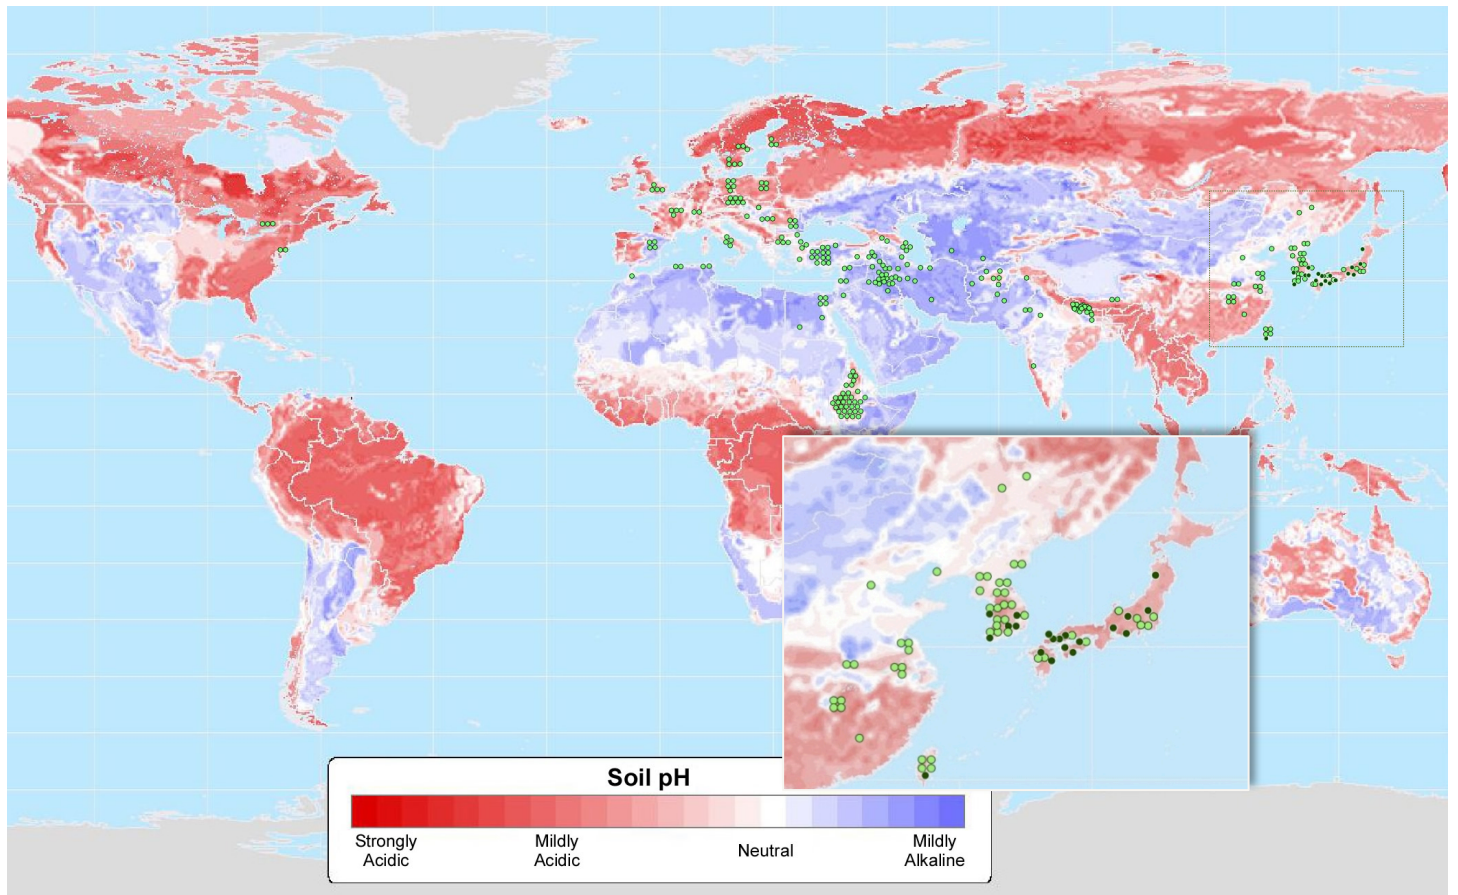

**Supplementary Figure S4.** Geographic distribution of cultivated barley accessions with (dark green) or without (light green) 1-kb insertion in the upstream of *HvAACT1* gene  
 A total of 265 cultivated barley accessions collected from the world collection are spotted. Soil pH image is originally provided as the Atlas of the Biosphere by Center for Sustainability and the Global Environment (SAGE), part of the Nelson Institute for Environmental Studies at the University of Wisconsin – Madison (<http://sage.wisc.edu/atlas/>).

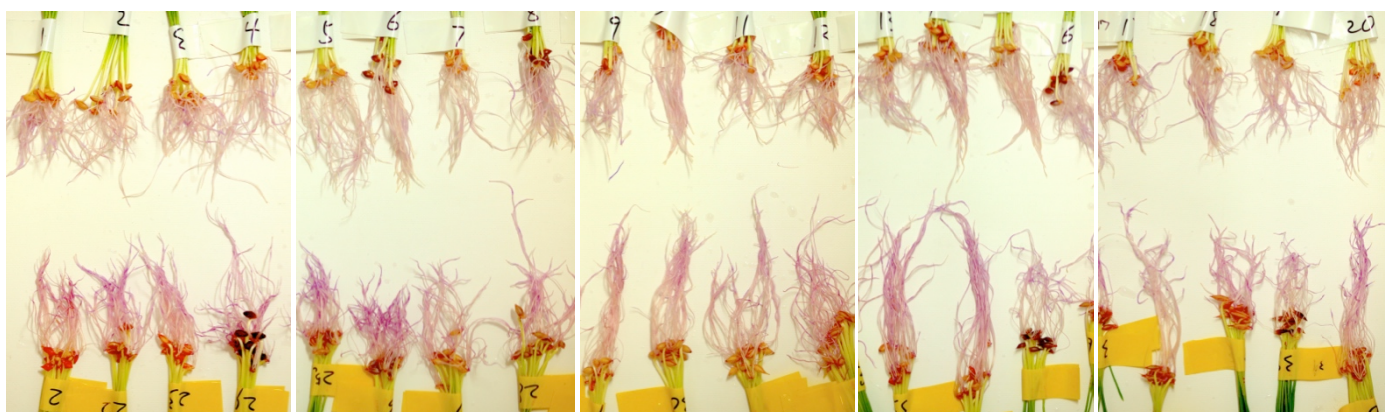

**Supplementary Figure S5.** Evaluation of Al tolerance in 40 barley cultivars. Seedlings (1-w-old) were exposed to 1.0 mM CaCl<sub>2</sub> solution (pH 5.0) containing 3 μM Al. After 48 h, the roots were stained by 0.1% Eriochrome cyanine for 15 min. Upper row, cultivars with 1-kb insertion; lower row, cultivars without 1-kb insertion.



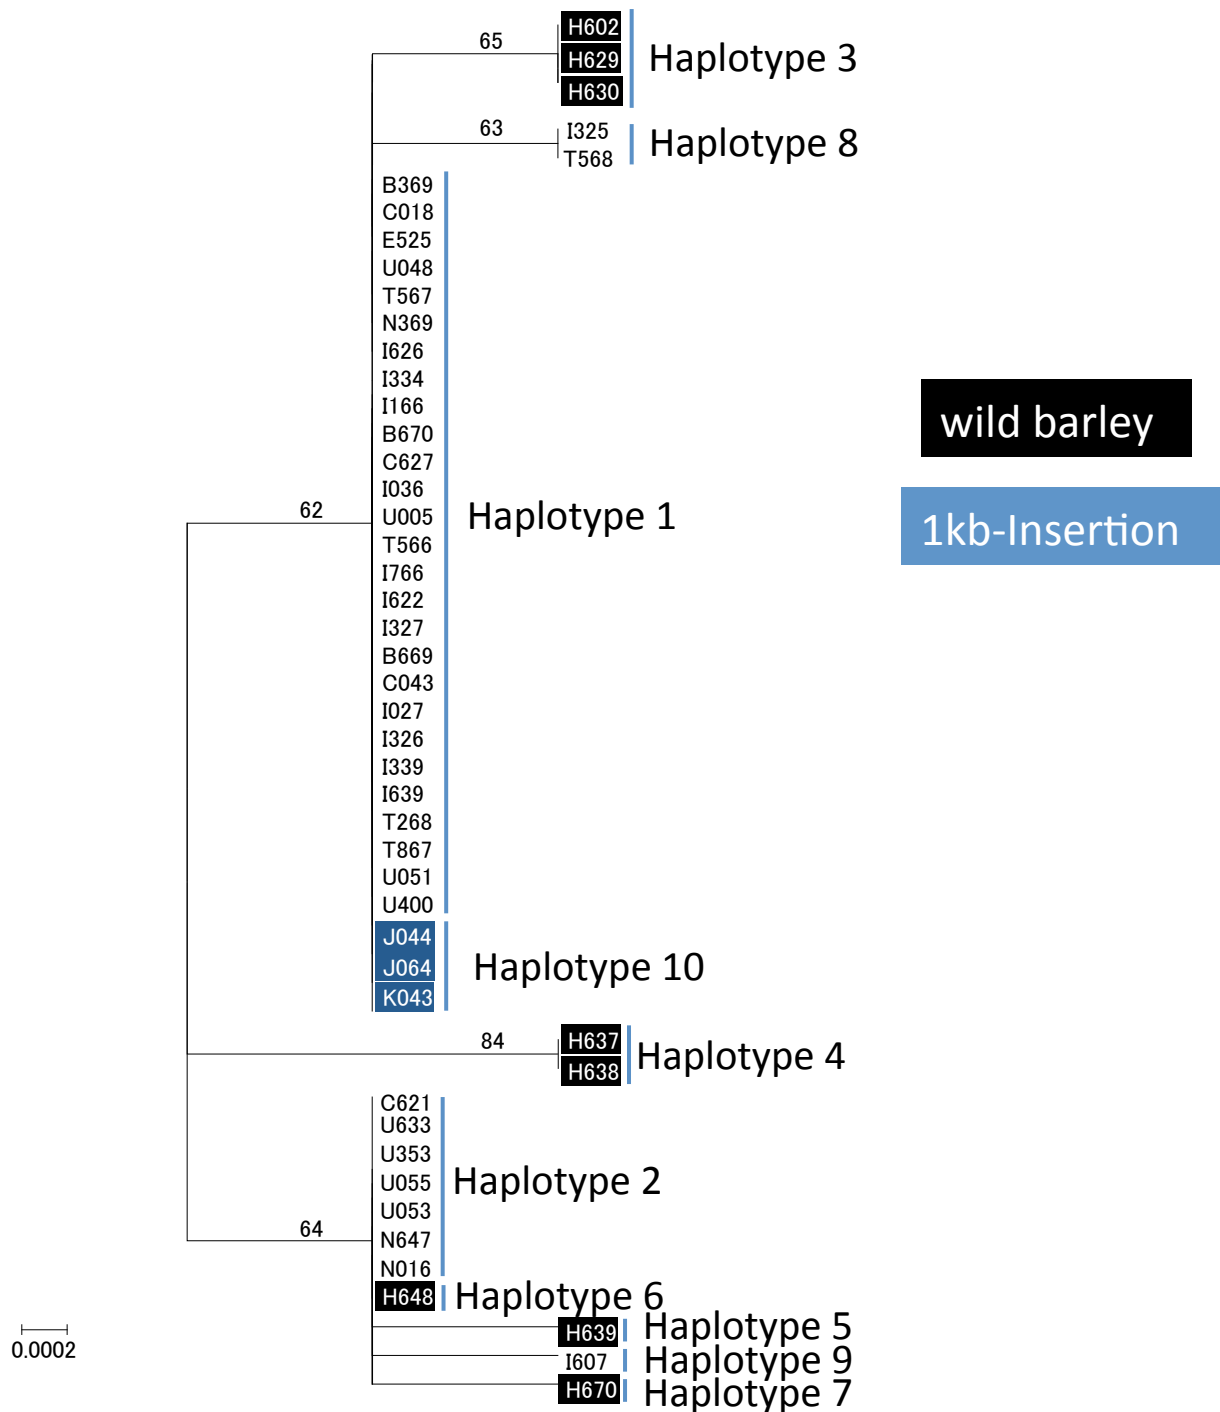

**Supplementary Figure S6.** Neighbor-joining (NJ) tree based on SNPs in the 5' flanking region and 2<sup>nd</sup> intron of *HvAACT1*.

Wild barley accessions and cultivated accessions with the 1kb-insertion are highlighted by black and blue, respectively. Haplotype numbers indicated in Supplementary Table S3 are shown next to each taxa. The evolutionary distances were computed using the Kimura 2-parameter method. The analysis involved 48 nucleotide sequences, and all positions containing indel mutations were eliminated. The percentage of replicate trees in which the associated taxa clustered together in the bootstrap test (1000 replicates) are shown above to the branches. NJ analyses were conducted in MEGA5.

**Supplementary Table S1.** List of barley accessions used for sequence analysis of *HvAACT1*

| Taxon        | Geographic region | n              |
|--------------|-------------------|----------------|
| Wild         | Near East         | 4              |
|              | Southwest Asia    | 2              |
|              | Transcaucasus     | 1              |
|              | Unknown           | 1              |
|              | (Total)           | 8              |
| .....        |                   |                |
| Domesticated | (Western region)  |                |
|              | Europe            | 7              |
|              | North Africa      | 3              |
|              | Ethiopia          | 1              |
|              | Turkey            | 5              |
|              | Near East         | 10             |
|              | (Eastern region)  |                |
|              | Southwest Asia    | 4              |
|              | Himalaya          | 3              |
|              | China             | 4              |
|              | Korea             | 1 <sup>a</sup> |
|              | Japan             | 2 <sup>a</sup> |
|              | (Total)           | 40             |

---

a. 1 kb inserted

**Supplementary Table S2.** Summary of nucleotide variation of *HvAACT1* gene among 48 accessions

|        | 5' flanking region <sup>a</sup> |       |       |       |       |           | 2nd intron <sup>b</sup> |     |     |     |     |     |     |     |     |     |     |     | n  | wild | cultivated |
|--------|---------------------------------|-------|-------|-------|-------|-----------|-------------------------|-----|-----|-----|-----|-----|-----|-----|-----|-----|-----|-----|----|------|------------|
|        | -5348                           | -5281 | -5226 | -5217 | -4752 | -4745     | 596                     | 597 | 598 | 599 | 600 | 601 | 602 | 618 | 767 | 776 | 869 | 937 |    |      |            |
| Hap_1  | G                               | C     | T     | G     | T     | -         | A                       | A   | G   | G   | G   | G   | A   | C   | C   | G   | C   | -   | 27 |      | 27         |
| Hap_2  | .                               | .     | .     | T     | C     | -         | .                       | .   | .   | .   | .   | .   | .   | .   | .   | .   | .   | .   | 7  |      | 7          |
| Hap_3  | .                               | T     | .     | .     | .     | -         | .                       | .   | .   | .   | .   | .   | .   | .   | .   | .   | .   | .   | 3  | 3    |            |
| Hap_4  | .                               | .     | .     | T     | .     | -         | .                       | .   | .   | .   | .   | .   | .   | T   | .   | T   | .   | .   | 2  |      | 2          |
| Hap_5  | .                               | .     | G     | T     | C     | -         | .                       | .   | .   | .   | .   | .   | .   | .   | .   | .   | .   | T   | 1  |      | 1          |
| Hap_6  | .                               | .     | .     | T     | C     | -         | -                       | -   | -   | -   | -   | -   | -   | .   | .   | .   | .   | .   | 1  |      | 1          |
| Hap_7  | .                               | .     | .     | T     | C     | -         | .                       | .   | .   | .   | .   | .   | .   | .   | T   | .   | .   | .   | 1  |      | 1          |
| Hap_8  | .                               | .     | .     | .     | .     | -         | .                       | .   | .   | .   | .   | .   | .   | .   | .   | .   | A   | T   | 2  |      | 2          |
| Hap_9  | A                               | .     | .     | T     | C     | -         | .                       | .   | .   | .   | .   | .   | .   | .   | .   | .   | .   | .   | 1  |      | 1          |
| Hap_10 | .                               | .     | .     | .     | .     | (1kb-Ins) | .                       | .   | .   | .   | .   | .   | .   | .   | .   | .   | .   | .   | 3  |      | 3          |
|        |                                 |       |       |       |       |           |                         |     |     |     |     |     |     |     |     |     |     |     | 48 | 8    | 40         |

Deletion mutations are indicated by '-'.  
a. positions of 'Morex' 5' flanking sequence are shown (1st base of initiation codon as '1').  
b. Positions of 'Haruna Nijo' (AB331641) sequence are shown (1st base of initiation codon as '1').

**Supplementary Table S3. Surveys of the 1 kb-insertion in wild barley accessions**

| No. | OUNo. | Variety                 | Geographic group | Origin | HvAACT1<br>Indel | sequenced<br>(Haplotype_ID) <sup>a</sup> |
|-----|-------|-------------------------|------------------|--------|------------------|------------------------------------------|
| 1   | H601  | spont. eu-spont.        | Southwest Asia   | AFG    | 0                |                                          |
| 2   | H602  | spont. transcasp.       | unknown          |        | 0                | 3                                        |
| 3   | H603  | spontaneum 2558         | Southwest Asia   | IRN    | 0                |                                          |
| 4   | H604  | spontaneum 2294         | unknown          |        | 0                |                                          |
| 5   | H605  | spontaneum 3325         | Southwest Asia   | IRN    | 0                |                                          |
| 6   | H606  | spontaneum 4140         | Southwest Asia   | AFG    | 0                |                                          |
| 7   | H607  | spontaneum 4142         | Southwest Asia   | AFG    | 0                |                                          |
| 8   | H608  | spontaneum 4163         | Southwest Asia   | AFG    | 0                |                                          |
| 9   | H609  | spontaneum 4164         | Southwest Asia   | AFG    | 0                |                                          |
| 10  | H610  | spontaneum 5060         | Transcaucasus    | SSU    | 0                |                                          |
| 11  | H611  | spontaneum 5101         | Transcaucasus    | SSU    | 0                |                                          |
| 12  | H612  | spontaneum 6229         | Near East        | TKY    | 0                |                                          |
| 13  | H613  | spontaneum 6586         | Southwest Asia   | AFG    | 0                |                                          |
| 14  | H614  | spontaneum 6908         | Southwest Asia   | IRN    | 0                |                                          |
| 15  | H615  | spontaneum 6912         | Southwest Asia   | IRN    | 0                |                                          |
| 16  | H616  | spontaneum 7111         | Southwest Asia   | IRN    | 0                |                                          |
| 17  | H617  | spontaneum 8825         | unknown          |        | 0                |                                          |
| 18  | H618  | spontaneum 211041       | Southwest Asia   | AFG    | 0                |                                          |
| 19  | H619  | spontaneum 212305       | Southwest Asia   | AFG    | 0                |                                          |
| 20  | H620  | spontaneum 212306       | Southwest Asia   | AFG    | 0                |                                          |
| 21  | H621  | spontaneum 219921       | Southwest Asia   | AFG    | 0                |                                          |
| 22  | H622  | spontaneum 220341       | Southwest Asia   | AFG    | 0                |                                          |
| 23  | H623  | spontaneum 220523       | Southwest Asia   | AFG    | 0                |                                          |
| 24  | H624  | spontaneum 220664       | Southwest Asia   | AFG    | 0                |                                          |
| 25  | H625  | spontaneum 227019       | Near East        | IRN    | 0                |                                          |
| 26  | H626  | spontaneum 227301       | Near East        | IRN    | 0                |                                          |
| 27  | H627  | spontaneum 235639       | unknown          |        | 0                |                                          |
| 28  | H628  | spontaneum 6(b) (5022)  | Southwest Asia   | PKS    | 0                |                                          |
| 29  | H629  | spontaneum 15(b) (5024) | Southwest Asia   | PKS    | 0                | 3                                        |
| 30  | H630  | spontaneum 56(b) (5026) | Southwest Asia   | AFG    | 0                | 3                                        |
| 31  | H631  | spontaneum 56(c) (5027) | Southwest Asia   | AFG    | 0                |                                          |
| 32  | H632  | spontaneum 372 (5031)   | Southwest Asia   | IRN    | 0                |                                          |
| 33  | H633  | spontaneum 389I (5032)  | Southwest Asia   | IRN    | 0                |                                          |
| 34  | H634  | spontaneum 625II (5028) | Southwest Asia   | AFG    | 0                |                                          |
| 35  | H635  | spontaneum 625III(5029) | Southwest Asia   | AFG    | 0                |                                          |
| 36  | H636  | spontaneum 657I (5030)  | Southwest Asia   | AFG    | 0                |                                          |
| 37  | H637  | spontaneum 168 (5058)   | Near East        | SAR    | 0                | 4                                        |
| 38  | H638  | spontaneum 332          | Near East        | JAD    | 0                | 4                                        |
| 39  | H639  | spontaneum 1625         | Near East        | TKY    | 0                | 5                                        |
| 40  | H640  | spontaneum (Nepal)      | Southwest Asia   | NPL    | 0                |                                          |
| 41  | H642  | proskowetzii P.I.247928 | Near East        | CPS    | 0                |                                          |
| 42  | H643  | ischnatherum SUM I-a    | Southwest Asia   | SSU    | 0                |                                          |
| 43  | H644  | ischnatherum SUM I-b    | Southwest Asia   | SSU    | 0                |                                          |
| 44  | H645  | ischnatherum SUM I-c    | Southwest Asia   | SSU    | 0                |                                          |
| 45  | H646  | ischnatherum SUM I-d    | Southwest Asia   | SSU    | 0                |                                          |
| 46  | H647  | spontaneum SUM II-a     | Southwest Asia   | SSU    | 0                |                                          |
| 47  | H648  | spontaneum SUM II-b     | Southwest Asia   | SSU    | 0                | 6                                        |
| 48  | H649  | spontaneum SUM II-c     | Southwest Asia   | SSU    | 0                |                                          |
| 49  | H650  | ischnatherum KON I-a    | Southwest Asia   | SSU    | 0                |                                          |
| 50  | H651  | ischnatherum KON I-b    | Southwest Asia   | SSU    | 0                |                                          |

|     |      |                        |                |     |   |
|-----|------|------------------------|----------------|-----|---|
| 51  | H652 | ischnatherum KON I-c   | Southwest Asia | SSU | 0 |
| 52  | H653 | ischnatherum KON I-d   | Southwest Asia | SSU | 0 |
| 53  | H654 | spontaneum KON II-a    | Southwest Asia | SSU | 0 |
| 54  | H655 | spontaneum KON II-b    | Southwest Asia | SSU | 0 |
| 55  | H656 | ischnatherum MAN I-a   | Southwest Asia | SSU | 0 |
| 56  | H657 | ischnatherum MAN I-b   | Southwest Asia | SSU | 0 |
| 57  | H658 | ischnatherum MAN II-a  | Southwest Asia | SSU | 0 |
| 58  | H659 | ischnatherum MAN II-b  | Southwest Asia | SSU | 0 |
| 59  | H660 | ischnatherum MAN II-c  | Southwest Asia | SSU | 0 |
| 60  | H664 | ischnatherum GAU I-a   | Southwest Asia | SSU | 0 |
| 61  | H665 | ischnatherum GAU I-b   | Southwest Asia | SSU | 0 |
| 62  | H666 | ischnatherum GAU I-c   | Southwest Asia | SSU | 0 |
| 63  | H667 | spontaneum TAK I-a     | Southwest Asia | SSU | 0 |
| 64  | H668 | spontaneum TAK I-b     | Southwest Asia | SSU | 0 |
| 65  | H669 | spontaneum TAK IIA-a   | Southwest Asia | SSU | 0 |
| 66  | H670 | spontaneum TAK IIA-b   | Southwest Asia | SSU | 0 |
| 67  | H671 | spontaneum TAK IIB     | Southwest Asia | SSU | 0 |
| 68  | H672 | ischnatherum TSH I-a   | Southwest Asia | SSU | 0 |
| 69  | H673 | ischnatherum TSH I-b   | Southwest Asia | SSU | 0 |
| 70  | H674 | spontaneum 6247        | Southwest Asia | SSU | 0 |
| 71  | H675 | spontaneum Caucasas 2  | Transcaucasus  | SSU | 0 |
| 72  | H676 | spontaneum Caucasas 4  | Transcaucasus  | SSU | 0 |
| 73  | H677 | spontaneum Caucasas 5  | Transcaucasus  | SSU | 0 |
| 74  | H678 | spontaneum Caucasas 6  | Transcaucasus  | SSU | 0 |
| 75  | H679 | spontaneum Caucasas 7  | Transcaucasus  | SSU | 0 |
| 76  | H680 | spontaneum Caucasas 8  | Transcaucasus  | SSU | 0 |
| 77  | H681 | spontaneum Caucasas 9  | Transcaucasus  | SSU | 0 |
| 78  | H682 | spontaneum Caucasas 10 | Transcaucasus  | SSU | 0 |
| 79  | H683 | spontaneum Caucasas 11 | Transcaucasus  | SSU | 0 |
| 80  | H684 | spontaneum Caucasas 12 | Transcaucasus  | SSU | 0 |
| 81  | H686 | spontaneum Caucasas 14 | Transcaucasus  | SSU | 0 |
| 82  | H687 | spontaneum Caucasas 36 | Transcaucasus  | SSU | 0 |
| 83  | H688 | spontaneum 487-1       | unknown        |     | 0 |
| 84  | H689 | spontaneum 4969        | Near East      | TKY | 0 |
| 85  | H690 | spontaneum 12148       | Near East      | TKY | 0 |
| 86  | H691 | spontaneum S- 1        | Near East      | IRQ | 0 |
| 87  | H694 | spontaneum S- 4        | Near East      | IRQ | 0 |
| 88  | H695 | spontaneum S- 5        | Near East      | IRQ | 0 |
| 89  | H696 | spontaneum S- 6        | Near East      | IRQ | 0 |
| 90  | H697 | spontaneum S- 7        | Near East      | IRQ | 0 |
| 91  | H698 | spontaneum S- 8        | Near East      | IRQ | 0 |
| 92  | H699 | spontaneum S- 9        | Near East      | IRQ | 0 |
| 93  | H700 | spontaneum S-10        | Near East      | IRQ | 0 |
| 94  | H701 | spontaneum S-11        | Near East      | IRQ | 0 |
| 95  | H702 | spontaneum S-12        | Near East      | IRQ | 0 |
| 96  | H703 | spontaneum S-13        | Near East      | IRQ | 0 |
| 97  | H704 | spontaneum S-14        | Near East      | IRQ | 0 |
| 98  | H705 | spontaneum S-15        | Near East      | IRQ | 0 |
| 99  | H706 | spontaneum S-16        | Near East      | IRQ | 0 |
| 100 | H707 | spontaneum S-17        | Near East      | IRQ | 0 |
| 101 | H709 | spontaneum S-19        | Near East      | IRQ | 0 |
| 102 | H710 | spontaneum S-20        | Near East      | IRQ | 0 |
| 103 | H711 | spontaneum S-21        | Near East      | IRQ | 0 |

|     |      |                    |               |     |   |
|-----|------|--------------------|---------------|-----|---|
| 104 | H712 | spontaneum S-22    | Near East     | IRQ | 0 |
| 105 | H713 | spontaneum S-23    | Near East     | IRQ | 0 |
| 106 | H714 | spontaneum S-24    | Near East     | IRQ | 0 |
| 107 | H715 | spontaneum S-25    | Near East     | IRQ | 0 |
| 108 | H716 | spontaneum S-26    | Near East     | IRQ | 0 |
| 109 | H717 | spontaneum S-27    | Near East     | IRQ | 0 |
| 110 | H718 | spontaneum S-28    | Near East     | IRQ | 0 |
| 111 | H719 | spontaneum S-29    | Near East     | IRQ | 0 |
| 112 | H721 | spontaneum S-31    | Near East     | IRQ | 0 |
| 113 | H722 | spontaneum S-32    | Near East     | IRQ | 0 |
| 114 | H723 | spontaneum S-33    | Near East     | IRQ | 0 |
| 115 | H724 | spontaneum S-34    | Near East     | IRQ | 0 |
| 116 | H725 | spontaneum S-35    | Near East     | TKY | 0 |
| 117 | H726 | spontaneum S-36    | Near East     | TKY | 0 |
| 118 | H727 | spontaneum S-37    | Near East     | TKY | 0 |
| 119 | H728 | spontaneum S-38    | Near East     | IRN | 0 |
| 120 | H729 | spontaneum S-39    | Near East     | IRN | 0 |
| 121 | H730 | proskowetzii II    | Transcaucasus | SSU | 0 |
| 122 | H731 | proskowetzii III   | Transcaucasus | SSU | 0 |
| 123 | H732 | proskowetzii S- 1  | Near East     | IRQ | 0 |
| 124 | H733 | proskowetzii S- 2  | Near East     | IRQ | 0 |
| 125 | H734 | proskowetzii S- 3  | Near East     | IRQ | 0 |
| 126 | H735 | proskowetzii S- 4  | Near East     | IRQ | 0 |
| 127 | H736 | proskowetzii S- 5  | Near East     | IRQ | 0 |
| 128 | H737 | proskowetzii S- 6  | Near East     | IRQ | 0 |
| 129 | H738 | proskowetzii S- 7  | Near East     | IRQ | 0 |
| 130 | H739 | proskowetzii S- 8  | Near East     | IRQ | 0 |
| 131 | H740 | proskowetzii S- 9  | Near East     | IRQ | 0 |
| 132 | H741 | proskowetzii S-10  | Near East     | IRQ | 0 |
| 133 | H742 | proskowetzii S-11  | Near East     | IRQ | 0 |
| 134 | H743 | proskowetzii S-12  | Near East     | IRQ | 0 |
| 135 | H744 | proskowetzii S-13a | Near East     | IRQ | 0 |
| 136 | H745 | proskowetzii S-13b | Near East     | IRQ | 0 |
| 137 | H746 | proskowetzii S-14  | Near East     | IRQ | 0 |
| 138 | H747 | proskowetzii S-15  | Near East     | IRQ | 0 |
| 139 | H748 | proskowetzii S-16a | Near East     | IRQ | 0 |
| 140 | H749 | proskowetzii S-16b | Near East     | IRQ | 0 |
| 141 | H751 | proskowetzii S-17  | Near East     | IRQ | 0 |
| 142 | H752 | proskowetzii S-18  | Near East     | IRQ | 0 |
| 143 | H753 | proskowetzii S-19  | Near East     | IRQ | 0 |
| 144 | H754 | proskowetzii S-20  | Near East     | IRQ | 0 |
| 145 | H755 | proskowetzii S-21  | Near East     | IRQ | 0 |
| 146 | H756 | proskowetzii S-22  | Near East     | IRQ | 0 |
| 147 | H757 | proskowetzii S-23  | Near East     | IRQ | 0 |
| 148 | H758 | proskowetzii S-24  | Near East     | IRQ | 0 |
| 149 | H759 | proskowetzii S-25  | Near East     | IRQ | 0 |
| 150 | H760 | proskowetzii S-26  | Near East     | IRQ | 0 |
| 151 | H761 | proskowetzii S-27  | Near East     | IRQ | 0 |
| 152 | H762 | proskowetzii S-28  | Near East     | IRQ | 0 |
| 153 | H763 | proskowetzii S-29  | Near East     | IRN | 0 |
| 154 | H764 | proskowetzii S-30  | Near East     | IRN | 0 |

a. Haplotype IDs defined in supplementary Table S2 are indicated by numerals.
